# Supplementary material for: Impact of flash glucose monitoring on hypoglycaemia in adults with type 1 diabetes managed with multiple daily injection therapy: a pre-specified subgroup analysis of the IMPACT randomised controlled trial
Source: PubMed Central journal article supplement (PMC6448969; doi:10.1007/s00125-017-4527-5), 2017-12-23
Supplement: 125_2017_4527_MOESM1_ESM.pdf [file 125_2017_4527_MOESM1_ESM.pdf]

**Electronic supplementary material (ESM) for:**

*Impact of flash glucose monitoring on hypoglycaemia in adults with type 1 diabetes managed with multiple daily injection therapy: a pre-specified subgroup analysis of the IMPACT randomised controlled trial*

Per Oskarsson, Ramiro Antuna, Petronella Geelhoed-Duijvestijn, Jens Kröger, Raimund Weitgasser  
Jan Bolinder

**ESM table 1:** Mean number of glucose readings used in the primary endpoint analysis

|              | Baseline            |                | Study End           |                |
|--------------|---------------------|----------------|---------------------|----------------|
|              | Intervention (n=81) | Control (n=79) | Intervention (n=81) | Control (n=79) |
| Overall 24 h | 1265                | 1269           | 1364                | 1172           |
| Daytime      | 901                 | 902            | 968                 | 827            |
| Night-time   | 364                 | 367            | 396                 | 345            |

**ESM table 2:** Data used for the primary analysis where 72 h of data in the final 2 weeks (days 194–208) were not available

| Number of participants    | Baseline | Days 45–75 | Days 75–91 | Days 91–105 | Days 105–194 | Days 105–208 |
|---------------------------|----------|------------|------------|-------------|--------------|--------------|
| Intervention <sup>a</sup> | 0        | 2          | 1          | 1           | 2            | 2            |
| Control                   | 10       |            |            | 1           |              |              |

<sup>a</sup>Two intervention arm participants had some data in days 194–208 but less than 72 h, so data from the period prior to day 194 were added to make up the 72 h

**ESM table 3: Glycaemic and glucose variability measures at 3 months**

| Variable                                  | Baseline            |                | Study end           |                | Difference in adjusted means between intervention and control (95% CI) | Difference in intervention vs control (%) | p value |
|-------------------------------------------|---------------------|----------------|---------------------|----------------|------------------------------------------------------------------------|-------------------------------------------|---------|
|                                           | Intervention (n=81) | Control (n=79) | Intervention (n=81) | Control (n=79) |                                                                        |                                           |         |
| HbA <sub>1c</sub> (mmol/mol)              | 50.8 (4.8)          | 49.9 (7.5)     | 52.2 (6.3)          | 51.6 (7.5)     | -0.1 (-1.7, 1.5)                                                       | NA                                        | 0.91    |
| HbA <sub>1c</sub> (%)                     | 6.80 (0.44)         | 6.71 (0.69)    | 6.92 (0.58)         | 6.87 (0.68)    | -0.01 (-0.15, 0.14)                                                    | NA                                        | 0.91    |
| Time in glucose 3.9–10.0 mmol/l (h)       | 15.0 (2.6)          | 14.3 (2.9)     | 15.8 (2.8)          | 13.8 (3.0)     | 1.6 (0.9, 2.3)                                                         | 11.4                                      | <0.0001 |
| <b>Glucose &lt;3.9 mmol/l</b>             |                     |                |                     |                |                                                                        |                                           |         |
| 24 h period                               |                     |                |                     |                |                                                                        |                                           |         |
| Events                                    | 1.80 (0.80)         | 1.72 (0.75)    | 1.25 (0.68)         | 1.65 (0.84)    | -0.45 (-0.65, -0.24)                                                   | -26.6                                     | <0.0001 |
| Duration (h)                              | 3.44 (2.10)         | 3.73 (2.72)    | 1.88 (1.32)         | 3.39 (2.37)    | -1.37 (-1.84, -0.90)                                                   | -41.2                                     | <0.0001 |
| AUC (h x mmol/l)                          | 3.17 (2.57)         | 3.60 (3.38)    | 1.46 (1.35)         | 3.20 (2.93)    | -1.56 (-2.15, -0.97)                                                   | -50.1                                     | <0.0001 |
| Night period (23:00 – 06:00 hours)        |                     |                |                     |                |                                                                        |                                           |         |
| Events                                    | 0.57 (0.34)         | 0.61 (0.38)    | 0.35 (0.27)         | 0.55 (0.33)    | -0.19 (-0.27, -0.11)                                                   | -35.1                                     | <0.0001 |
| Time in h                                 | 1.20 (0.89)         | 1.41 (1.12)    | 0.66 (0.65)         | 1.33 (0.95)    | -0.59 (-0.81, -0.37)                                                   | -45.7                                     | <0.0001 |
| <b>Glucose &lt;3.1 mmol/l</b>             |                     |                |                     |                |                                                                        |                                           |         |
| 24 h period                               |                     |                |                     |                |                                                                        |                                           |         |
| Events                                    | 1.01 (0.65)         | 1.00 (0.69)    | 0.52 (0.44)         | 0.90 (0.68)    | -0.39 (-0.54, -0.25)                                                   | -43.5                                     | <0.0001 |
| Duration (h)                              | 1.75 (1.53)         | 1.99 (1.97)    | 0.75 (0.81)         | 1.76 (1.73)    | -0.90 (-1.25, -0.55)                                                   | -52.9                                     | <0.0001 |
| AUC (h x mmol/l)                          | 1.00 (1.07)         | 1.20 (1.39)    | 0.39 (0.48)         | 1.06 (1.25)    | -0.60 (-0.86, -0.34)                                                   | -58.7                                     | <0.0001 |
| Night period (23:00 – 06:00 hours)        |                     |                |                     |                |                                                                        |                                           |         |
| Events                                    | 0.37 (0.27)         | 0.41 (0.34)    | 0.17 (0.19)         | 0.35 (0.24)    | -0.16 (-0.22, -0.10)                                                   | -47.2                                     | <0.0001 |
| Duration (h)                              | 0.67 (0.62)         | 0.85 (0.85)    | 0.31 (0.42)         | 0.78 (0.73)    | -0.40 (-0.57, -0.23)                                                   | -53.7                                     | <0.0001 |
| <b>Glucose &lt;2.5 mmol/l<sup>a</sup></b> |                     |                |                     |                |                                                                        |                                           |         |
| 24 h period                               |                     |                |                     |                |                                                                        |                                           |         |
| Events                                    | 0.61 (0.55)         | 0.63 (0.59)    | 0.26 (0.34)         | 0.59 (0.63)    | -0.32 (-0.45, -0.19)                                                   | -54.1                                     | <0.0001 |
| Duration (h)                              | 0.97 (1.15)         | 1.19 (1.48)    | 0.35 (0.49)         | 1.05 (1.37)    | -0.62 (-0.91, -0.34)                                                   | -61.4                                     | <0.0001 |
| AUC (h x mmol/l)                          | 0.26 (0.34)         | 0.32 (0.44)    | 0.09 (0.13)         | 0.28 (0.40)    | -0.17 (-0.26, -0.09)                                                   | -63.6                                     | <0.0001 |
| Night period (23:00 – 06:00 hours)        |                     |                |                     |                |                                                                        |                                           |         |
| Events                                    | 0.26 (0.25)         | 0.30 (0.32)    | 0.10 (0.15)         | 0.24 (0.23)    | -0.12 (-0.18, -0.07)                                                   | -53.1                                     | <0.0001 |
| Duration (h)                              | 0.40 (0.46)         | 0.56 (0.69)    | 0.16 (0.26)         | 0.51 (0.62)    | -0.30 (-0.44, -0.16)                                                   | -61.6                                     | <0.0001 |

| Variable                                                               | Baseline            |                | Study end           |                | Difference in adjusted means between intervention and control (95% CI) | Difference in intervention vs control (%) | p value |
|------------------------------------------------------------------------|---------------------|----------------|---------------------|----------------|------------------------------------------------------------------------|-------------------------------------------|---------|
|                                                                        | Intervention (n=81) | Control (n=79) | Intervention (n=81) | Control (n=79) |                                                                        |                                           |         |
| <b>Glucose &lt;2.2 mmol/l</b>                                          |                     |                |                     |                |                                                                        |                                           |         |
| 24 h period                                                            |                     |                |                     |                |                                                                        |                                           |         |
| Events                                                                 | 0.44 (0.48)         | 0.49 (0.52)    | 0.17 (0.25)         | 0.44 (0.56)    | -0.25 (-0.37, -0.13)                                                   | -58.0                                     | <0.0001 |
| Duration (h)                                                           | 0.69 (0.97)         | 0.88 (1.24)    | 0.23 (0.36)         | 0.77 (1.18)    | -0.48 (-0.73, -0.23)                                                   | -64.6                                     | 0.0002  |
| <b>Duration (h) at hyperglycaemic glucose level within 24 h period</b> |                     |                |                     |                |                                                                        |                                           |         |
| >10.0 mmol/l                                                           | 5.6 (2.4)           | 6.0 (3.3)      | 6.3 (2.9)           | 6.8 (3.6)      | -0.3 (-1.1, 0.5)                                                       | -4.2                                      | 0.50    |
| >13.3 mmol/l                                                           | 1.77 (1.36)         | 2.05 (1.86)    | 1.73 (1.37)         | 2.50 (2.15)    | -0.60 (-1.06, -0.14)                                                   | -24.8                                     | 0.011   |
| >16.7 mmol/l                                                           | 0.44 (0.50)         | 0.57 (0.77)    | 0.32 (0.37)         | 0.63 (0.91)    | -0.26 (-0.46, -0.06)                                                   | -43.3                                     | 0.011   |
| <b>Glucose variability</b>                                             |                     |                |                     |                |                                                                        |                                           |         |
| BGRI                                                                   | 8.1 (2.3)           | 8.7 (2.9)      | 7.4 (2.4)           | 9.2 (3.1)      | -1.4 (-2.1, -0.7)                                                      | -16.0                                     | <0.0001 |
| CV glucose (%)                                                         | 43.2 (6.6)          | 43.4 (6.5)     | 37.9 (6.2)          | 42.3 (6.6)     | -4.3 (-5.8, -2.8)                                                      | -10.2                                     | <0.0001 |
| LBGI                                                                   | 2.7 (1.4)           | 2.9 (1.8)      | 1.7 (1.0)           | 2.6 (1.5)      | -0.8 (-1.1, -0.5)                                                      | -31.9                                     | <0.0001 |
| MAGE (mmol/l)                                                          | 7.9 (1.5)           | 8.2 (1.8)      | 7.5 (1.4)           | 8.3 (1.9)      | -0.63 (-1.04, -0.22)                                                   | -7.8                                      | 0.0026  |
| Mean glucose (mmol/l)                                                  | 7.8 (1.0)           | 7.9 (1.4)      | 8.2 (1.0)           | 8.2 (1.5)      | 0.01 (-0.30, 0.32)                                                     | 0.1                                       | 0.94    |
| SD of glucose (mmol/l)                                                 | 3.4 (0.6)           | 3.4 (0.8)      | 3.1 (0.6)           | 3.5 (0.8)      | -0.35 (-0.51, -0.19)                                                   | -10.1                                     | <0.0001 |
| CONGA 2h (mmol/l)                                                      | 3.2 (0.7)           | 3.2 (0.8)      | 2.8 (0.7)           | 3.4 (0.8)      | -0.60 (-0.79, -0.42)                                                   | -17.9                                     | <0.0001 |
| CONGA 6h (mmol/l)                                                      | 4.0 (1.3)           | 4.0 (1.5)      | 3.2 (1.2)           | 4.1 (1.6)      | -0.87 (-1.29, -0.45)                                                   | -21.4                                     | <0.0001 |

Data are mean (SD) unless otherwise stated

<sup>a</sup>Post hoc endpoint

BGRI, blood glucose risk index; CONGA, continuous overall net glycaemic action; LBGI, low blood glucose index; MAGE, mean amplitude of glycaemic excursions

Baseline sensor data was not available for analysis for one control participant.

## List of study centres

23 study centres (three in Sweden, six in Austria, five in Germany, three in Spain, and six in the Netherlands).

*Chief Investigator (Sweden): J Bolinder, Karolinska Universitetssjukhuset Huddinge, Stockholm*

Other Swedish investigators:

M Alvarsson, Karolinska Universitetssjukhuset Solna, Stockholm

P Hallgren, Falu Lasarett, Falun

*Country Lead Principal Investigator (Austria): R Weitgasser, Diakonissen-Krankenhaus Salzburg, Abteilung für Innere Medizin, Salzburg*

Other Austrian investigators:

T Pieber, Medizinische Universität Graz, Graz

P Fasching, Wilhelminenspital Medizin, Wien

H Drexel, VIVIT-Institut am Akad. Lehrkrankenhaus Feldkirch, Feldkirch

A Luger, Medizinische Universität Wien, Wien

M Laimer/Dr Christoph Ebenbichler, Universitätsklinik für Innere Medizin I, Innsbruck

*Country Lead Principal Investigator (Germany): S Matthaei, Christliches Krankenhaus Quakenbrück gemeinnützige GmbH, Quakenbrück*

Other German investigators:

R Geldmacher, Diabetes-Zentrum Hannover-Nord, Hannover

J Kröger, Zentrum für Diabetologie Hamburg-Bergedorf, Hamburg

T Haak, Diabetes Zentrum Mergentheim, Bad Mergentheim

U Aigner, Versdias GmbH, Sulzbach-Rosenberg

*Country Lead Principal Investigator (Spain): R Antuna, Clinica Diabetologica, Gijon*

Other Spanish investigators:

E Aguilera, Hospital Universari Germans Trias i Pujol, Badalona

S Gaztambide Sáenz, Servicio de Endocrinología Hospital Universitario Cruces, Cruces-Barakaldo (Vizcaya)

*Country Lead Principal Investigator (Netherlands): P Geelhoed, Medisch Centrum Haaglanden, Den Haag*

Other Dutch investigators:

S van Thiel, Amphia Ziekenhuis, Breda

F Storms, St. Antonius, Utrecht

T Brouwer, Onze Lieve Vrouwe Gasthuis (OLVG), Amsterdam

E Serne, VU University Medical Center, Amsterdam

A Kooy, Bethesda Diabetes Research Center, Hoogeveen
